# Supplementary material
Source: Elsevier journal article supplement (https://www.sciencedirect.com/science/article/pii/S0213005X19302095)
Supplement: mmc1 [file S0213005X19302095:mmc1.xlsx]

## Sheet: Hoja1
Isolation site	Specie	Antibiotic:	CLR		FEP		CTX		MXF		CRO		AMK		DOX		LZD		MIN		CIP		TOB		SXT		AMC		IPM
Blood	N. farcinica	MIC:	≥16	R	≥32	R	≥64	R	0.25	S	≥64	R	2	S	≥16	R	8	S	≥16	R	1	S	≥64	R	2/38	S	8/4	S	≥16	R
MIC	minimum inhibitory concentration
CLR	clarithromycin
FEP	cefepime
CTX	cefotaxime
MXF	moxifloxacin
CRO	ceftriaxone
AMK	amikacin
DOX	doxycycline
LZD	linezolid
MIN	minocycline
CIP	ciprofloxacin
TOB	tobramycin
SXT	trimethoprim-sulfamethoxazole
AMC	amoxicillin-clavulanic acid
IPM	imipenem
